# Supplementary material for: Impact of moisture absorption on the resistive switching characteristics of a polyethylene oxide-based atomic switch
Source: Royal Society of Chemistry journal article supplement (doi:10.1039/d1tc01654g), 2021-01-01
Supplement: d1tc01654g1.pdf [file d1tc01654g1.pdf]

## Supplementary Information

### Impact of moisture absorption on the resistive switching characteristics of a polyethylene-based atomic switch

*Karthik Krishnan, Agnes Gubicza, Masakazu Aono, Kazuya Terabe, Ilia Valov,  
and Tohru Tsuruoka*

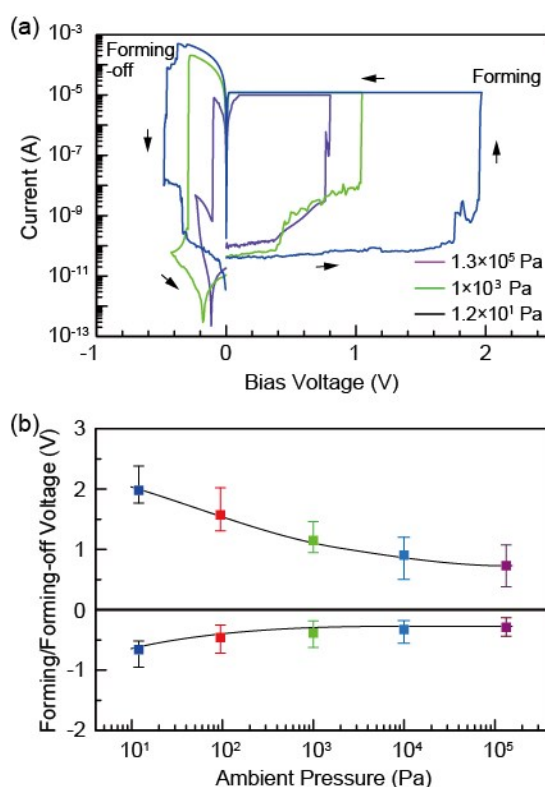

**Fig. S1** The ambient pressure dependence of the switching behavior of a Ag/Ag-PEO/Pt atomic switch. (a) Typical  $I$ - $V$  curves measured under varied ambient pressures. (b) The forming and forming-off voltages plotted as a function of the ambient pressure, evaluated from the measured  $I$ - $V$  curves. The solid curves are a guide to the eye.

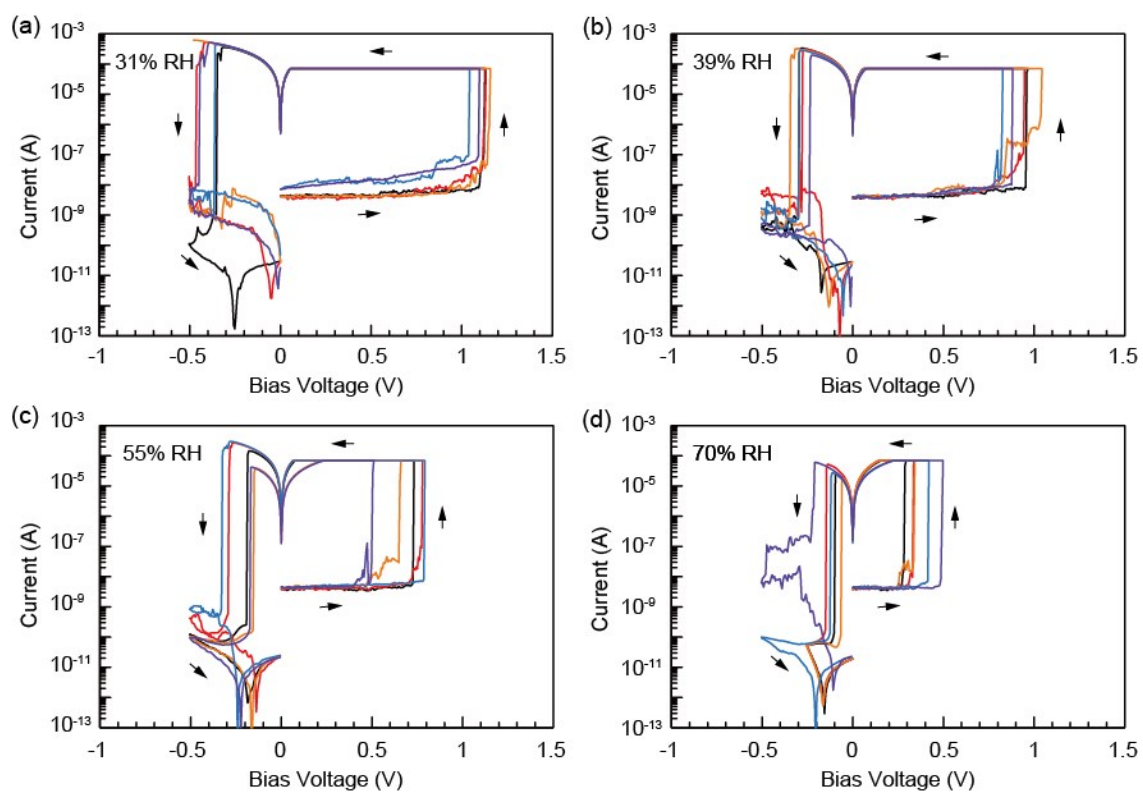

**Fig. S3**  $I$ - $V$  curves measured at each RH level: (a) 31%, (b) 39%, (c) 55%, and (d) 70%. The results show the reproducibility (and cycle-to-cycle variations) of the switching behaviour.

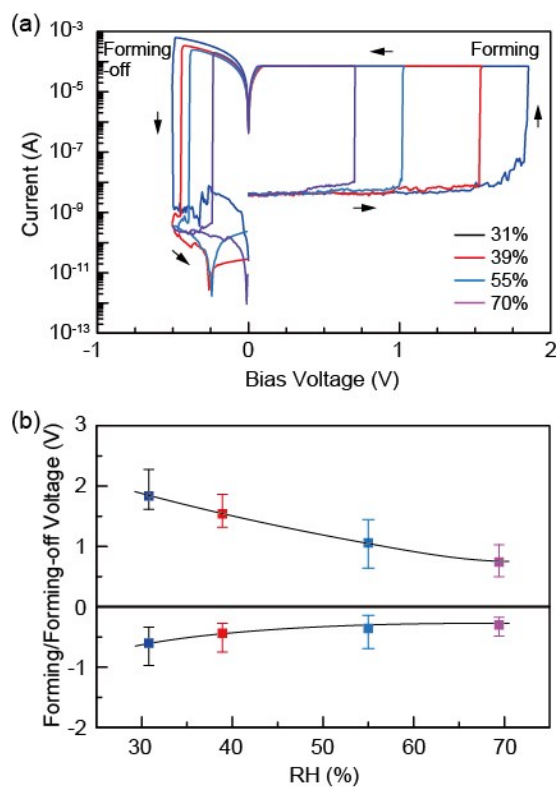

**Fig. S2** The humidity dependence of the switching behavior of a Ag/Ag-PEO/Pt atomic switch. (a) Typical  $I$ - $V$  curves measured under varied relative humidities (RH). (b) The forming and forming-off voltages plotted as a function of the RH level, evaluated from the measured  $I$ - $V$  curves. The solid curves are a guide to the eye.

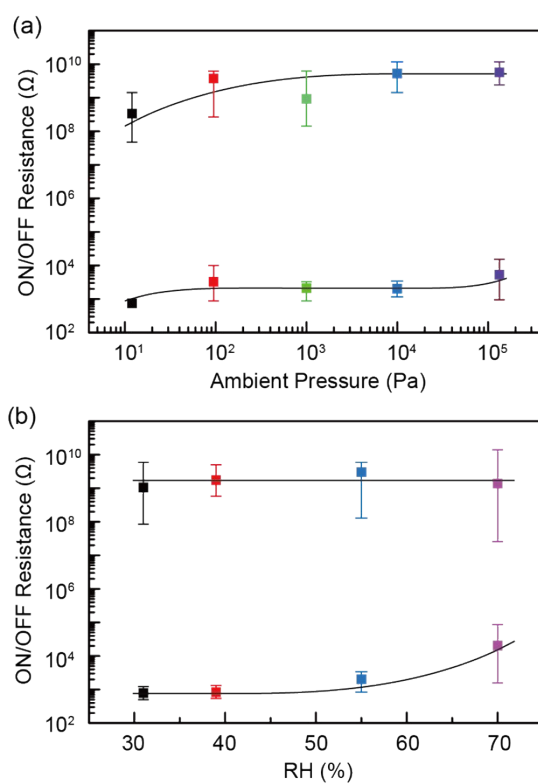

**Fig. S4** ON and OFF resistances plotted as a function of the ambient pressure (a) and RH level (b), which were collected from the measured  $I$ - $V$  curves. The solid curves are a guide to the eye.
